# Supplementary material for: Path Similarity Analysis: A Method for Quantifying Macromolecular Pathways
Source: PubMed Central journal article supplement (PMC4619321; doi:10.1371/journal.pcbi.1004568), 2015-10-21

**A**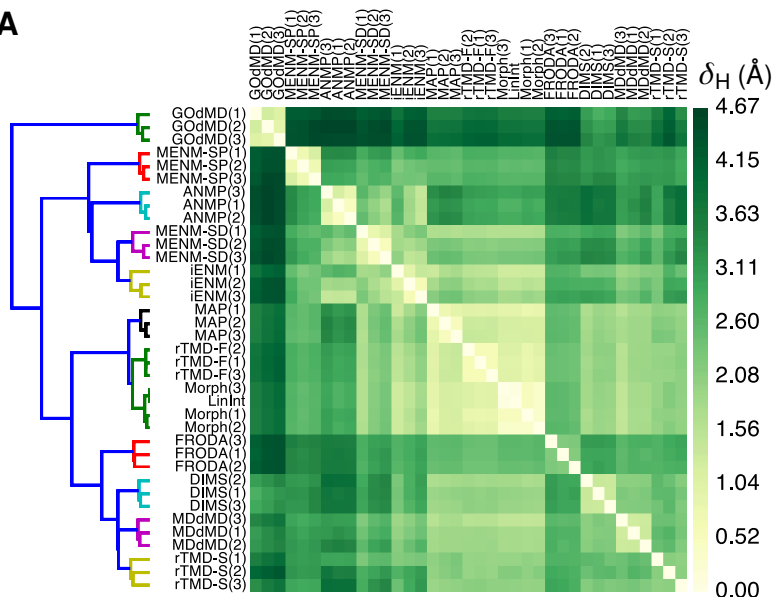**B**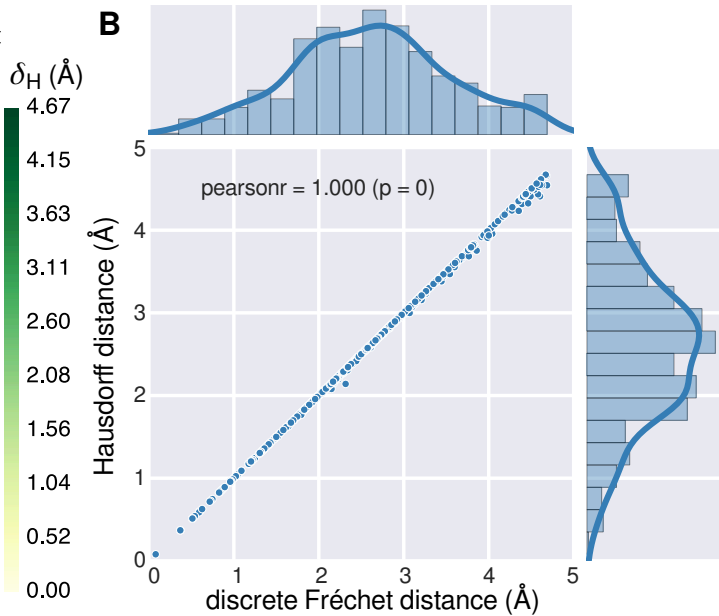

Supplement: pcbi.1004568.s013.pdf [file pcbi.1004568.s013.pdf]
