# Supplementary material for: Path Similarity Analysis: A Method for Quantifying Macromolecular Pathways
Source: PubMed Central journal article supplement (PMC4619321; doi:10.1371/journal.pcbi.1004568), 2015-10-21

discrete Fréchet distance  $\delta_F$  (Å)

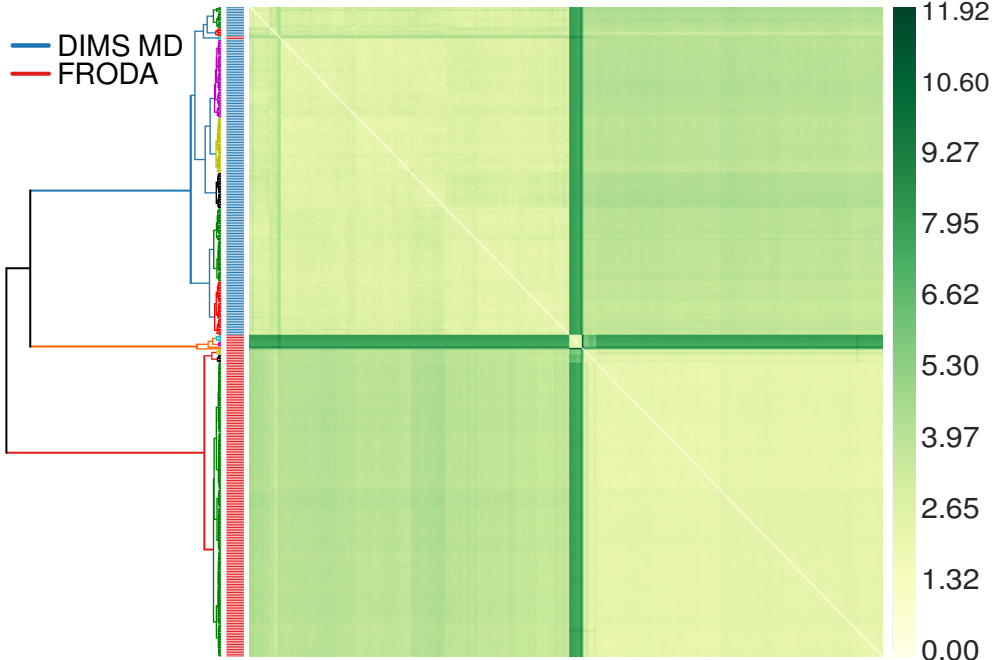

Supplement: pcbi.1004568.s015.pdf [file pcbi.1004568.s015.pdf]
